# Supplementary material
Source: PubMed Central journal article supplement (PMC11059200)
Supplement: NIHMS1983723-supplement-1.pdf [file NIHMS1983723-supplement-1.pdf]

## Appendix

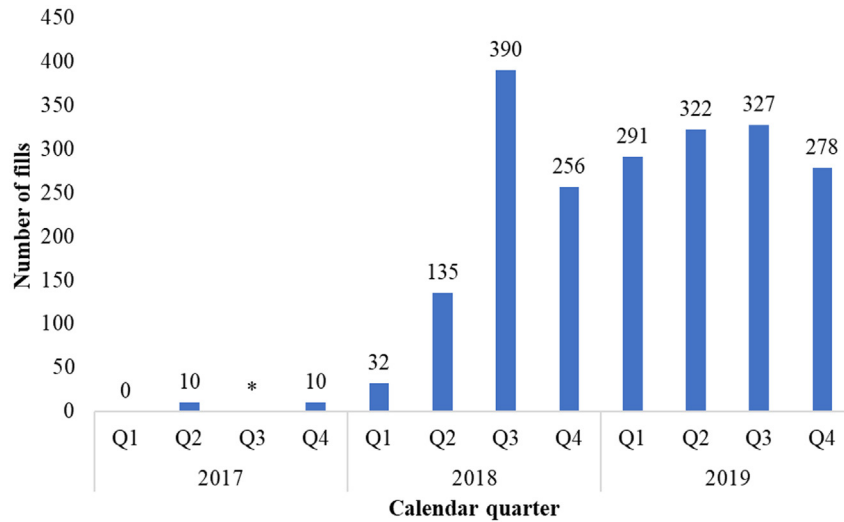

\*Censored due to small cell size

**Supplemental Figure 1.** Number of naloxone fills by Louisiana Medicaid members under the standing order, by calendar quarter, 2017 to 2019 (n = 2053), \*Censored due to small cell size.
